# Supplementary material for: A dinuclear CdII cluster-based stable luminescent metal–organic framework for the consecutive and visual detection of H2PO4− and OCN−
Source: Royal Society of Chemistry journal article supplement (doi:10.1039/d3dt03523a), 2024-01-01
Supplement: d3dt03523a1.pdf [file d3dt03523a1.pdf]

## *Electronic Supplementary Information (ESI)*

**A dinuclear Cd<sup>II</sup> cluster-based stable luminescent metal-organic framework for the consecutive and visual detection of H<sub>2</sub>PO<sub>4</sub><sup>-</sup> and OCN<sup>-</sup>**

**Na Lu, Li Wang, Teng-Fei Zheng,\* Yan Peng, Sui-Jun Liu\* and He-Rui Wen**

School of Chemistry and Chemical Engineering, Jiangxi Provincial Key Laboratory of Functional Molecular Materials Chemistry, Jiangxi University of Science and Technology, Ganzhou 341000, Jiangxi Province, P.R. China

---

\*Corresponding authors. E-mail: sjliu@jxust.edu.cn (S.-J. Liu), zhengtengfei0628@163.com (T.-F. Zheng).

## Materials and instrumentations

All chemical reagents were obtained from commercial sources and used without further purification. Notably, H<sub>2</sub>BTDB was purchased by Jilin Chinese Academy of Sciences -Yanshen Technology Co., Ltd. Thermogravimetric analysis (TGA) was performed under a N<sub>2</sub> flow at a heating rate of 10 °C min<sup>-1</sup> from 25 to 1000 °C on a NETZSCH STA2500 thermal analyzer. The powder X-ray diffraction (PXRD) patterns were recorded by Rigaku MiniFlex 600. The simulated PXRD pattern of single-crystal data was obtained using the Mercury (Hg) software, which is freely available on the Internet at <http://www.iucr.org>. IR spectra in the range of 4000-400 cm<sup>-1</sup> were collected with KBr particles on a Bruker Alpha FT-IR spectrometer. X-ray photoelectron spectrum (XPS) was obtained with an Axis Ultra DLD spectrometer. The fluorescence measurements were carried out on an F4600 (Hitachi) fluorescence spectrophotometer. The UV-vis absorption spectra for all samples were collected on a UV-2550 (SHIMADZU) spectrophotometer.

## Crystal Description

X-ray single-crystal diffraction data of **JXUST-47** were recorded on a Bruker D8 QUEST with  $\omega$ -scan pattern and Mo-K $\alpha$  radiation ( $\lambda = 0.71073 \text{ \AA}$ ). The structure is solved by using direct methods with SHELXTL software and refined using full-matrix least-squares.<sup>S1</sup> The anisotropic thermal parameters on non-hydrogen atoms are refined by  $F^2$ . This structure is based on weak and highly inconsistent data. Fig. S1 shows that there exist electrons or unresolved atoms in **JXUST-47**. As shown in Fig. S2, **JXUST-47** there exist numerous outliers. The  $R$  merge rises above 15% at about 1.4 (Fig. S3). As shown in Fig. S4, the  $I/\sigma$  drops below 3 at  $2\theta = 41$ . The ORTEP drawing of **JXUST-47** is shown in Fig. S5. During the collection of crystal data, scan width is 0.50 and exposure time is 10 s. The exposure time of 10 s may not be optimal, and the reason for the weak data is merely the limited crystal quality and the short exposure time.

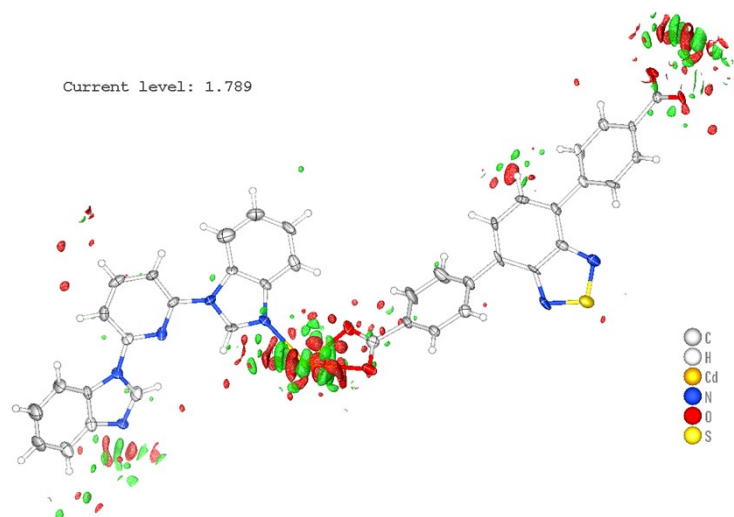

**Fig. S1** The residual density map of JXUST-47.

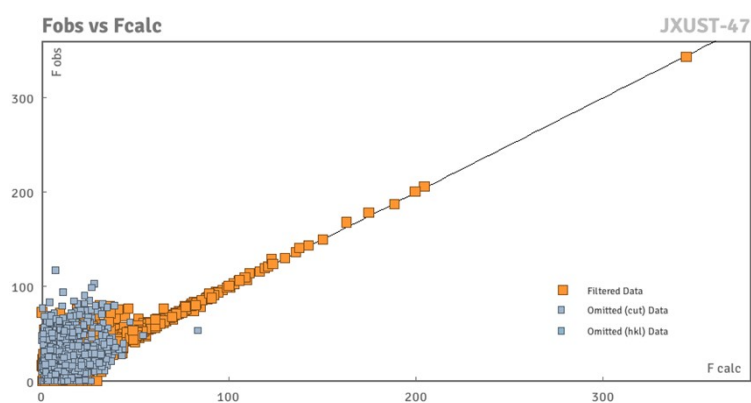

**Fig. S2** The  $F_{obs}$  vs  $F_{calc}$  plot of JXUST-47.

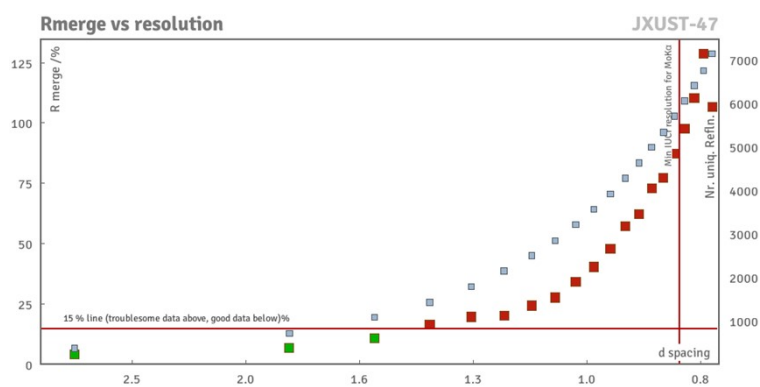

**Fig. S3** The plot of  $R$  merge vs resolution of JXUST-47.

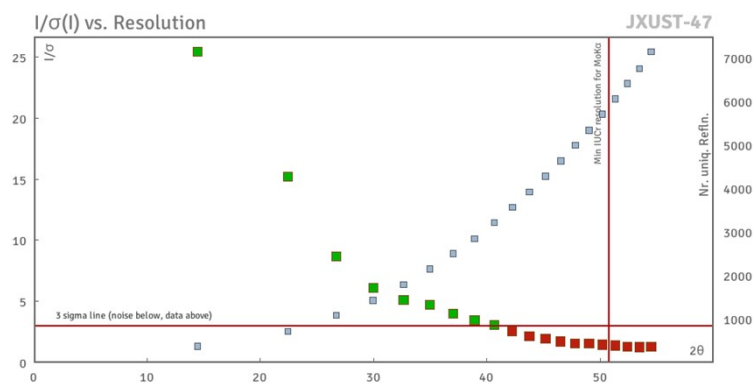

**Fig. S4** The plot of  $I/\sigma(I)$  vs resolution of JXUST-47.

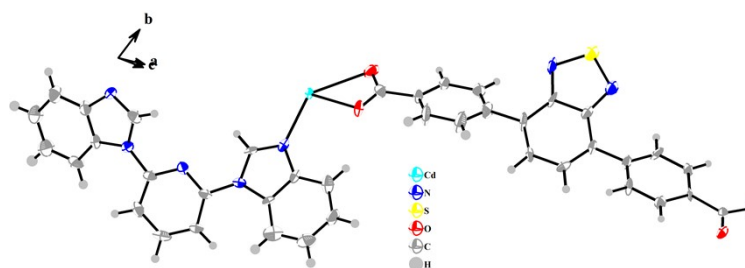

**Fig. S5** The ORTEP drawing of JXUST-47.

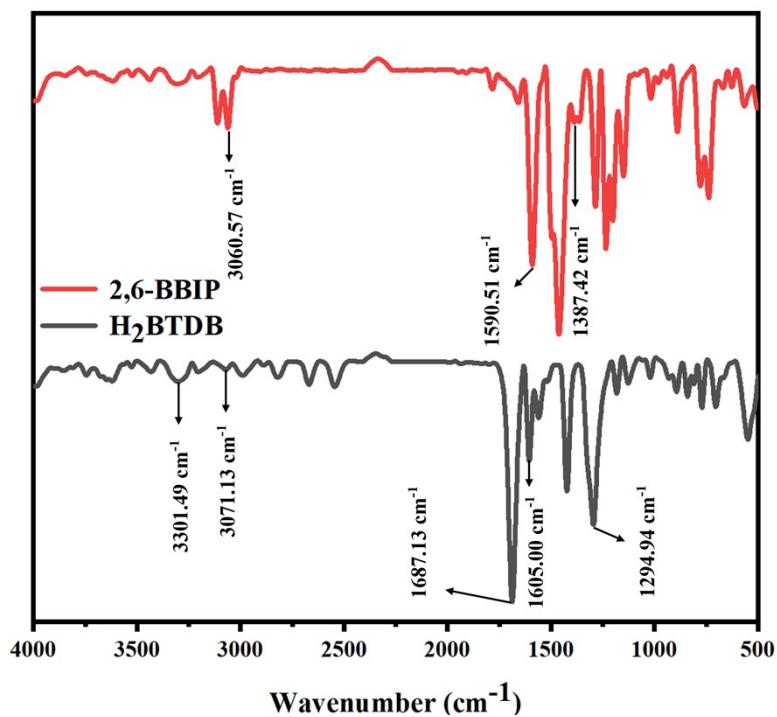

**Fig. S6** The IR spectra of 2,6-BBIP and H<sub>2</sub>BTDB.

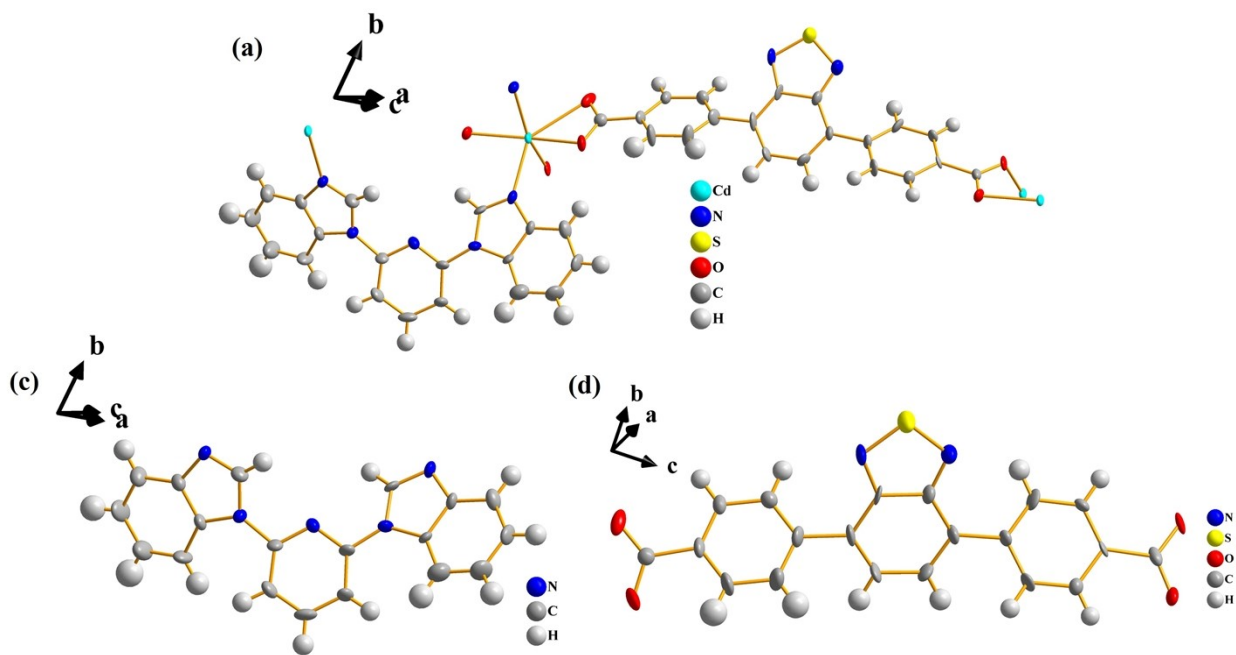

Fig. S7 The ellipsoid diagrams of (a) JXUST-47, (b) 2,6-BBIP and (c) H<sub>2</sub>BTDB.

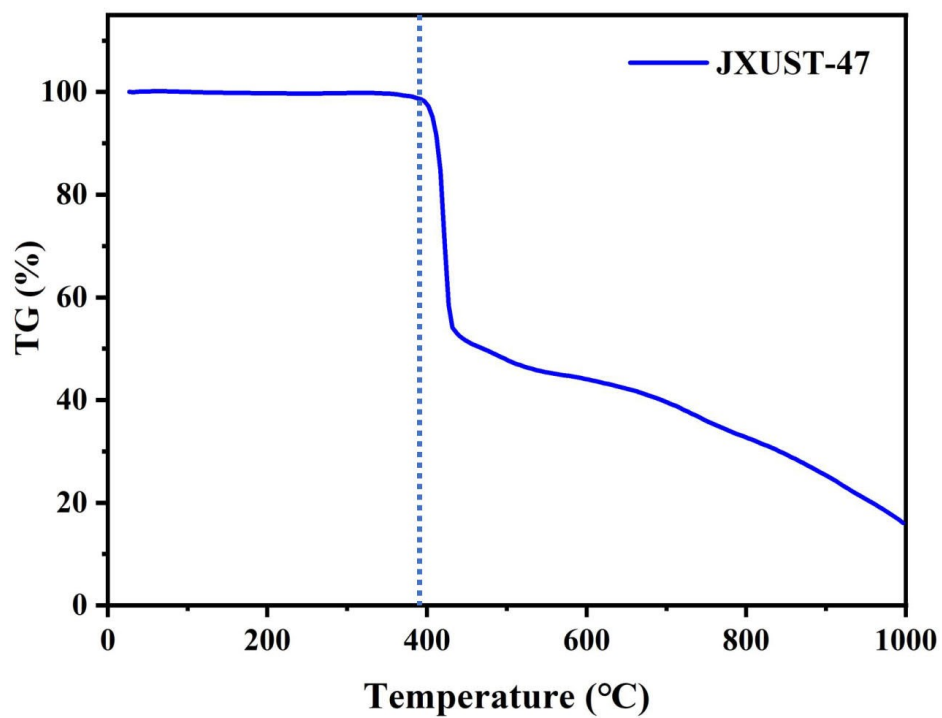

Fig. S8 The TGA curve of JXUST-47.

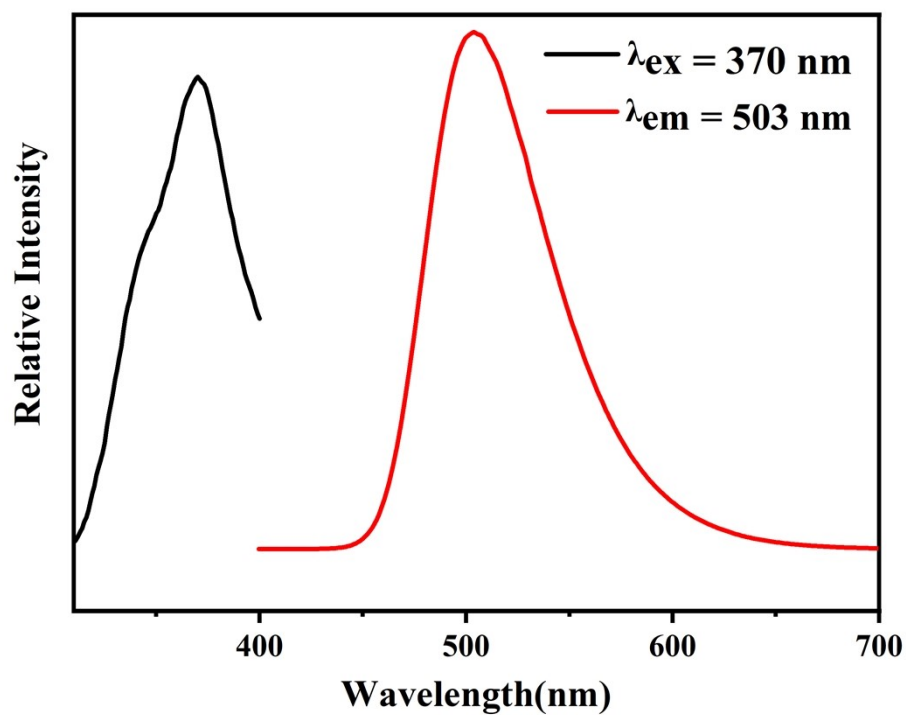

**Fig. S9** The solid-state excitation and emission spectra of JXUST-47.

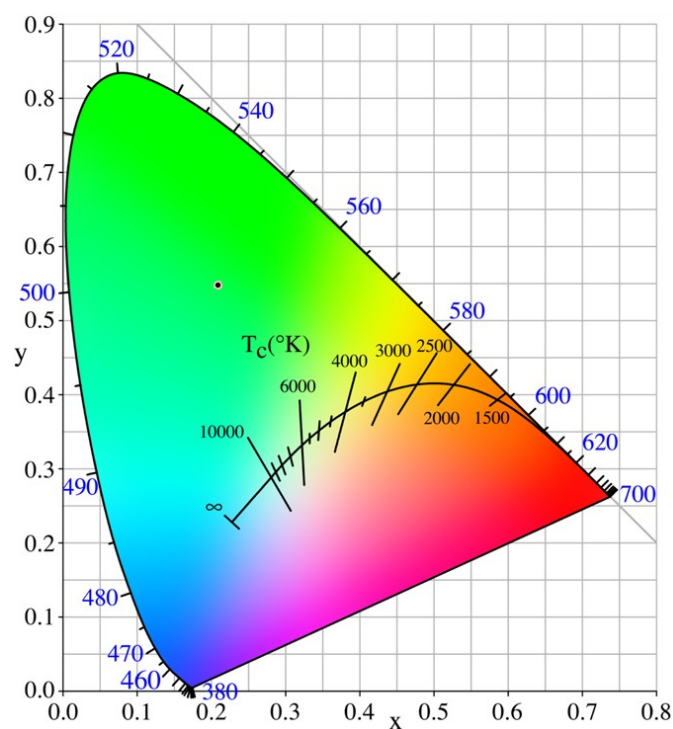

**Fig. S10** CIE chromaticity diagram displaying the color coordinate of JXUST-47.

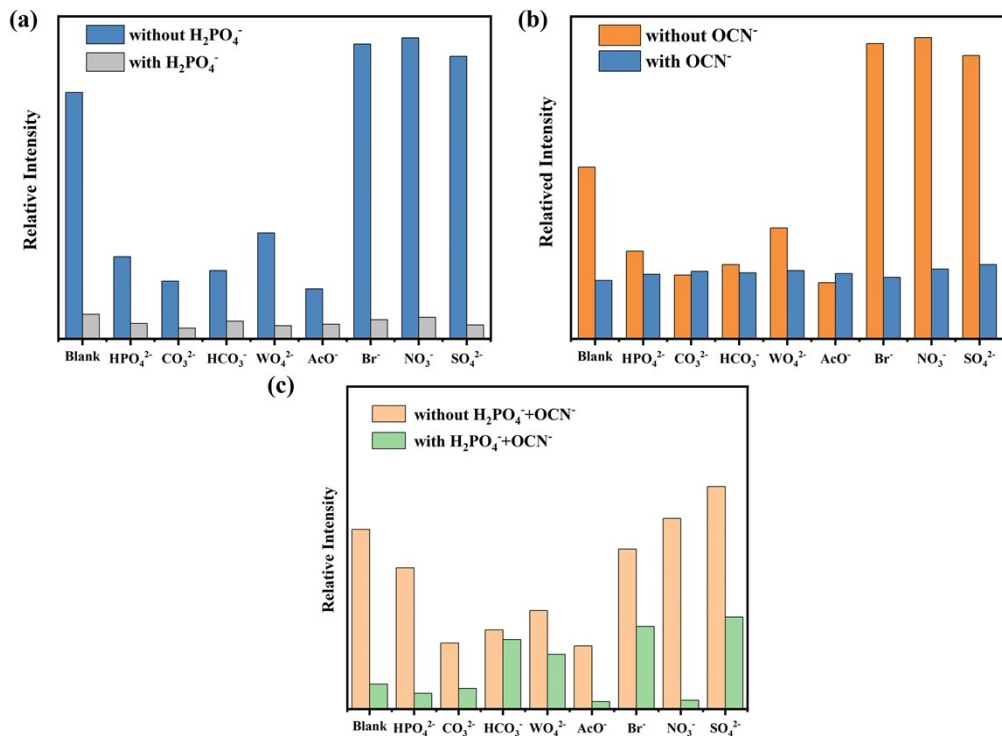

**Fig. S11** Competitive experiments of **JXUST-47** in sensing (a)  $\text{H}_2\text{PO}_4^-$ , (b)  $\text{OCN}^-$ , and (c)  $\text{H}_2\text{PO}_4^-$  and  $\text{OCN}^-$  with the other interfering substance.

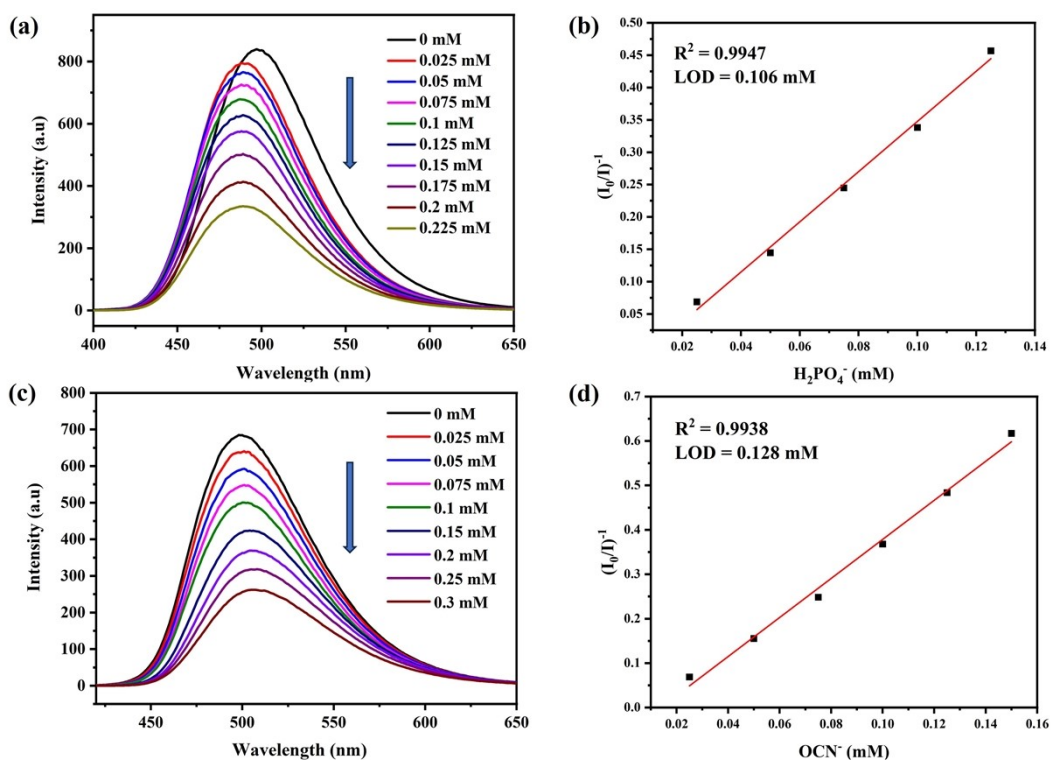

**Fig. S12** Emission spectra of **JXUST-47** dispersed in DMF suspension with different concentrations for (a)  $\text{H}_2\text{PO}_4^-$  and (c)  $\text{OCN}^-$  ions, and the linear relationship in a low concentration range between the fluorescence intensity of **JXUST-47** and the concentration of (b)  $\text{H}_2\text{PO}_4^-$  and (d)  $\text{OCN}^-$  ions.

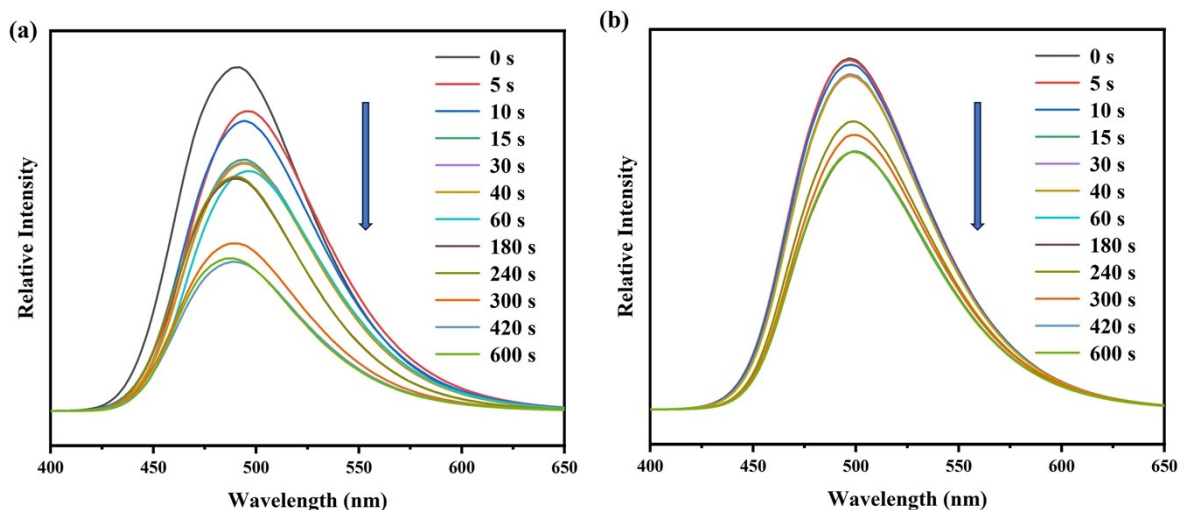

**Fig. S13** Time-dependent emission spectra of the suspension after adding 0.2 M (a)  $\text{H}_2\text{PO}_4^-$  and (b)  $\text{OCN}^-$ .

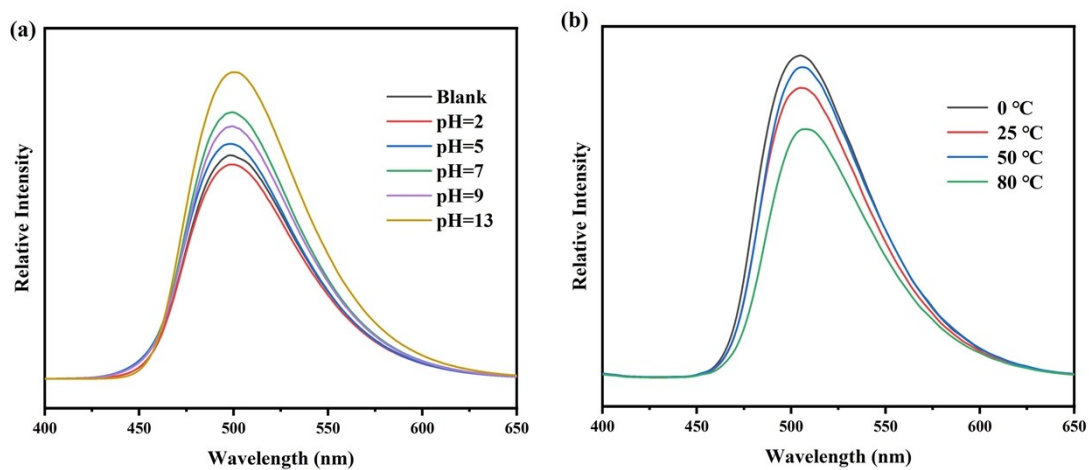

**Fig. S14** The emission spectra of **JXUST-47** (a) in DMF aqueous solution with different pH values and (b) at different temperatures.

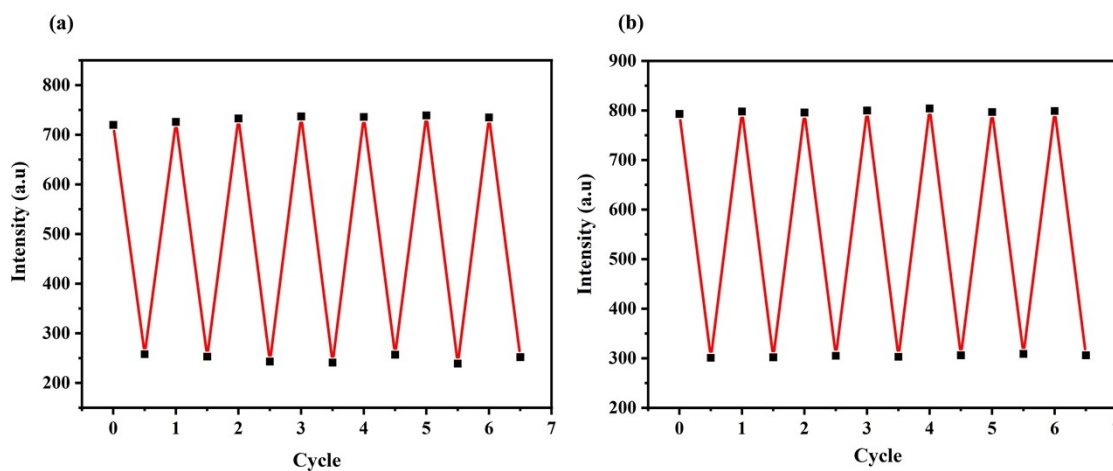

**Fig. S15** Relative luminescent intensity of **JXUST-47** after seven cycles for (a)  $\text{H}_2\text{PO}_4^-$  and (b)  $\text{OCN}^-$ .



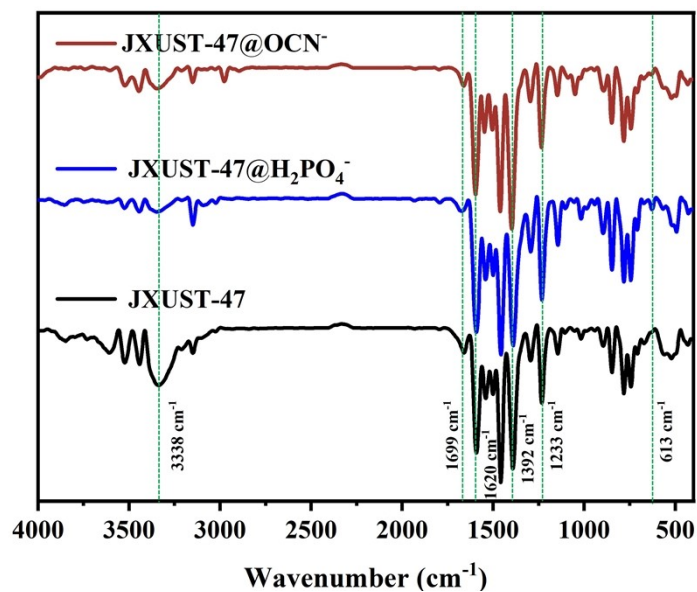

**Fig. S16** The IR spectra of as-synthesized JXUST-47 and JXUST-47 after sensing H<sub>2</sub>PO<sub>4</sub><sup>-</sup>/OCN<sup>-</sup>.

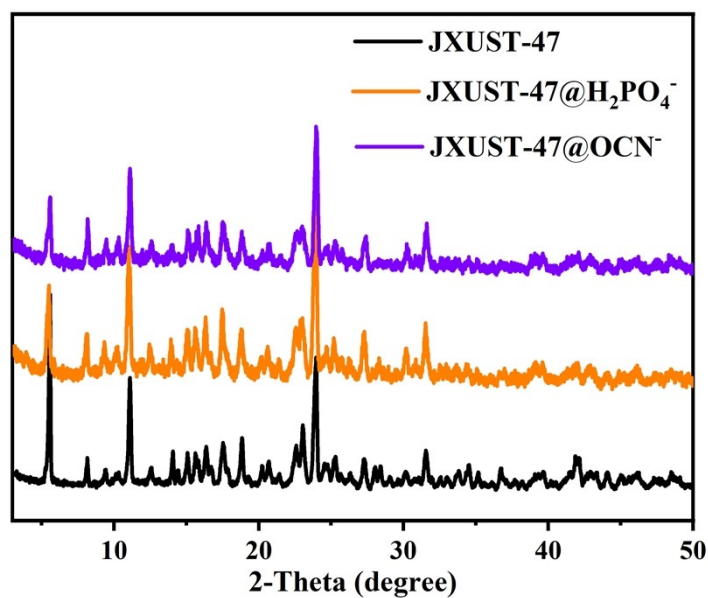

**Fig. S17** The PXRD patterns of as-synthesized JXUST-47 and JXUST-47 after sensing H<sub>2</sub>PO<sub>4</sub><sup>-</sup>/OCN<sup>-</sup>.

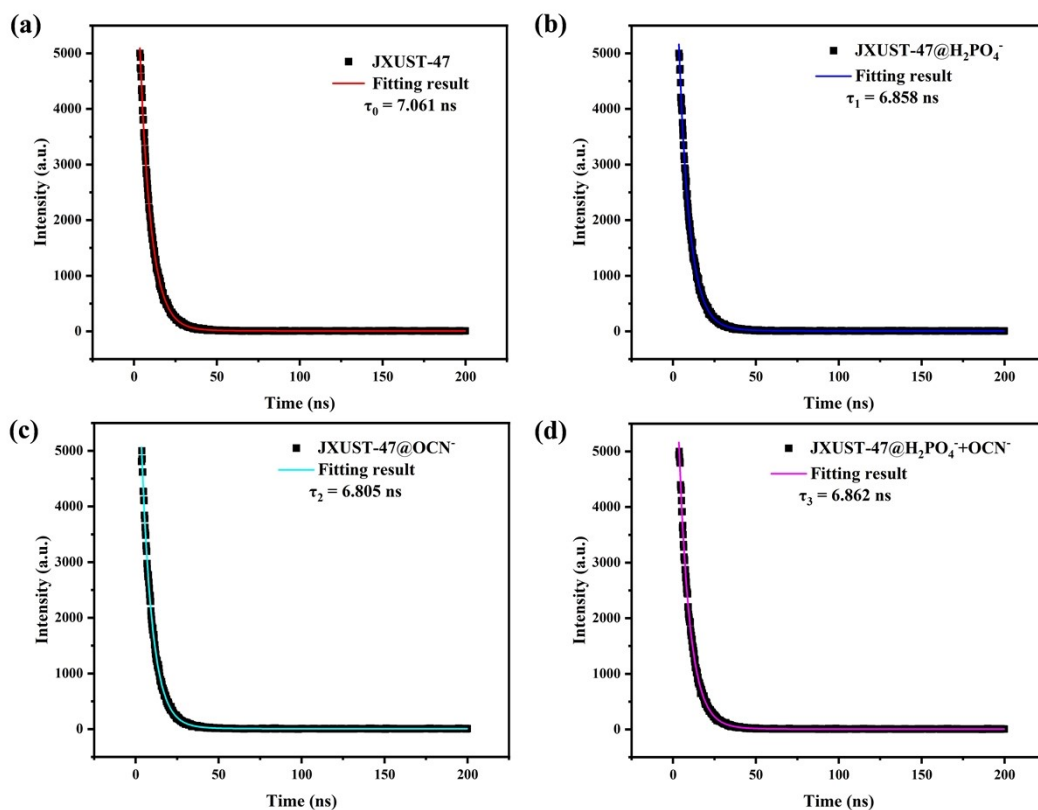

**Fig. S18** The luminescence decay curves of (a) JXUST-47, (b) JXUST-47@ H<sub>2</sub>PO<sub>4</sub><sup>-</sup>, (c) JXUST-47@ OCN<sup>-</sup> and (d) JXUST-47@ H<sub>2</sub>PO<sub>4</sub><sup>-</sup>+OCN<sup>-</sup> at room temperature.

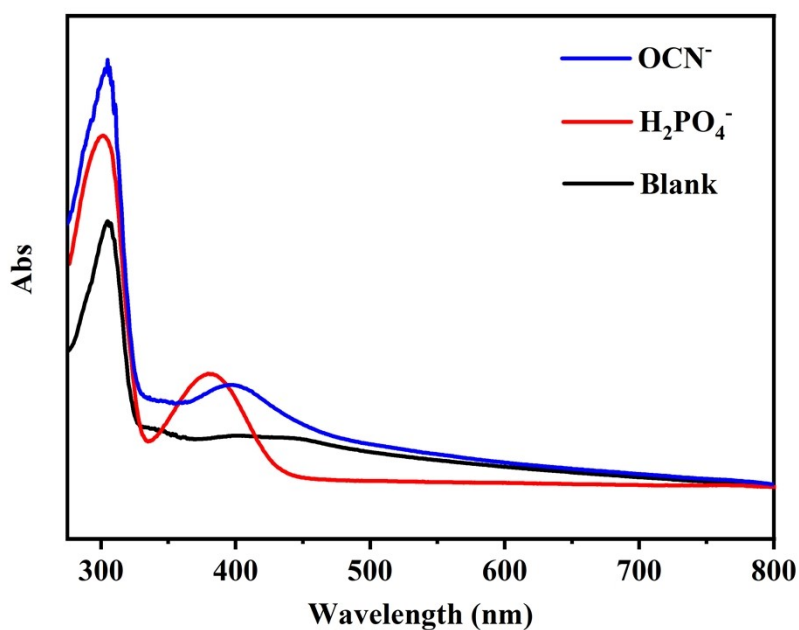

**Fig. S19** The UV-vis absorption spectra of JXUST-47 dispersed in DMF solution and JXUST-47 dispersed in DMF solution after adding H<sub>2</sub>PO<sub>4</sub><sup>-</sup> and OCN<sup>-</sup>.

**Table S1.** Crystal data and structure refinements for **JXUST-47**.

| Compound                                                                                              | <b>JXUST-47</b>                                                   |
|-------------------------------------------------------------------------------------------------------|-------------------------------------------------------------------|
| Formula                                                                                               | C <sub>39</sub> H <sub>23</sub> N <sub>7</sub> O <sub>4</sub> SCd |
| <i>M</i> <sub>r</sub>                                                                                 | 798.10                                                            |
| Temperature (K)                                                                                       | 293(2)                                                            |
| Crystal system                                                                                        | triclinic                                                         |
| Space group                                                                                           | <i>P</i> $\bar{1}$                                                |
| <i>a</i> (Å)                                                                                          | 9.4237(11)                                                        |
| <i>b</i> (Å)                                                                                          | 11.6946(13)                                                       |
| <i>c</i> (Å)                                                                                          | 16.1030(17)                                                       |
| $\alpha$ (°)                                                                                          | 82.624(5)                                                         |
| $\beta$ (°)                                                                                           | 83.013(5)                                                         |
| $\gamma$ (°)                                                                                          | 68.067(4)                                                         |
| <i>V</i> (Å <sup>3</sup> )                                                                            | 1627.3(3)                                                         |
| <i>Z</i>                                                                                              | 2                                                                 |
| <i>F</i> (000)                                                                                        | 804.0                                                             |
| <i>D</i> <sub>calc</sub> (g cm <sup>-3</sup> )                                                        | 1.629                                                             |
| $\mu$ (mm <sup>-1</sup> )                                                                             | 0.792                                                             |
| Reflections collected/unique                                                                          | 19017/5584                                                        |
| <i>R</i> <sub>int</sub>                                                                               | 0.1686                                                            |
| <i>R</i> <sub>1</sub> <sup>a</sup> / <i>wR</i> <sub>2</sub> <sup>b</sup> [ <i>I</i> > 2σ( <i>I</i> )] | 0.1032/0.1275                                                     |
| <i>R</i> <sub>1</sub> <sup>a</sup> / <i>wR</i> <sub>2</sub> <sup>b</sup> (all data)                   | 0.1708/0.1453                                                     |
| GOF on <i>F</i> <sup>2</sup>                                                                          | 1.074                                                             |

$${}^aR_1 = \Sigma(|F_0| - |F_C|)/\Sigma|F_0|; {}^b wR_2 = [\Sigma w(|F_0|^2 - |F_C|^2)^2 / (\Sigma w|F_0|^2)^2]^{1/2}.$$

**Table S2.** Selected bond lengths (Å) and angles (°) for **JXUST-47**<sup>a</sup>.

|                                       |          |                                         |          |
|---------------------------------------|----------|-----------------------------------------|----------|
| Cd1—O1                                | 2.211(6) | Cd1—N3                                  | 2.325(7) |
| Cd1—O2                                | 2.643(6) | Cd1—O4 <sup>ii</sup>                    | 2.388(6) |
| Cd1—O3 <sup>i</sup>                   | 2.268(5) | Cd1—N7 <sup>iii</sup>                   | 2.483(7) |
| O3 <sup>i</sup> —Cd1—O2               | 139.3(2) | O3 <sup>i</sup> —Cd1—N7 <sup>iii</sup>  | 78.8(2)  |
| O3 <sup>i</sup> —Cd1—N3               | 81.6(2)  | N3—Cd1—O2                               | 138.3(2) |
| O3 <sup>i</sup> —Cd1—O4 <sup>ii</sup> | 102.9(2) | N3—Cd1—O4 <sup>ii</sup>                 | 82.1(2)  |
| O1—Cd1—O2                             | 53.6(2)  | N3—Cd1—N7 <sup>iii</sup>                | 117.7(3) |
| O1—Cd1—O3 <sup>i</sup>                | 159.3(2) | O4 <sup>ii</sup> —Cd1—O2                | 80.4(2)  |
| O1—Cd1—N3                             | 90.8(2)  | O4 <sup>ii</sup> —Cd1—N7 <sup>iii</sup> | 160.0(2) |
| O1—Cd1—O4 <sup>ii</sup>               | 95.1(2)  | N7 <sup>iii</sup> —Cd1—O2               | 85.6(2)  |
| O1—Cd1—N7 <sup>iii</sup>              | 88.0(2)  |                                         |          |

<sup>a</sup>Symmetry codes: (i) *x*-1, *y*, *z*-1; (ii) -*x*+2, -*y*+1, -*z*+1; (iii) -*x*, -*y*+1, -*z*; (iv) *x*+1, *y*, *z*+1.

**Table S3.** Comparison of others work with **JXUST-47** for the fluorescence detection of  $\text{H}_2\text{PO}_4^-$ .

| MOFs                   | Sensing medium                      | LOD                 | Interferences                                                                                                                                                                                                                                                                                                                                                                                             | Bio-imaging | Reference        |
|------------------------|-------------------------------------|---------------------|-----------------------------------------------------------------------------------------------------------------------------------------------------------------------------------------------------------------------------------------------------------------------------------------------------------------------------------------------------------------------------------------------------------|-------------|------------------|
| UiO-66-NH <sub>2</sub> | H <sub>2</sub> O                    | 0.73 $\mu\text{M}$  | I <sup>-</sup> , Br <sup>-</sup> , Cl <sup>-</sup> ,<br>ClO <sub>4</sub> <sup>-</sup> , AcO <sup>-</sup> ,<br>SO <sub>4</sub> <sup>2-</sup> , HSO <sub>4</sub> <sup>-</sup> ,<br>P <sub>2</sub> O <sub>7</sub> <sup>4-</sup> , SCN <sup>-</sup> ,<br>AsO <sub>4</sub> <sup>3-</sup> , IO <sub>3</sub> <sup>-</sup> ,<br>AsO <sub>3</sub> <sup>3-</sup> , SO <sub>4</sub> <sup>2-</sup> , F <sup>-</sup> , | –           | S2               |
| F-MOF                  | CH <sub>3</sub> OH–H <sub>2</sub> O | 3.903 $\mu\text{M}$ | Br <sup>-</sup> , NO <sub>3</sub> <sup>-</sup> ,<br>CH <sub>3</sub> COO <sup>-</sup> ,<br>PO <sub>4</sub> <sup>3-</sup> , HF <sub>2</sub> <sup>-</sup> ,<br>AsO <sub>2</sub> <sup>-</sup> , CN <sup>-</sup> ,<br>HPO <sub>4</sub> <sup>2-</sup>                                                                                                                                                           | WI-38 cell  | S3               |
| Zn-DMBI                | CH <sub>3</sub> OH                  | 1.3 $\mu\text{M}$   | F <sup>-</sup> , SO <sub>4</sub> <sup>2-</sup> , ClO <sub>4</sub> <sup>-</sup> ,<br>NO <sub>3</sub> <sup>-</sup> , I <sup>-</sup> , TfO <sup>-</sup> ,<br>BF <sub>4</sub> <sup>-</sup> , AcO <sup>-</sup> , Br <sup>-</sup> ,<br>OH <sup>-</sup> , HCO <sub>3</sub> <sup>-</sup> ,<br>HSO <sub>4</sub> <sup>-</sup>                                                                                       | –           | S4               |
| <b>JXUST-44</b>        | DMF                                 | 0.121 $\mu\text{M}$ | F <sup>-</sup> , Br <sup>-</sup> , Cl <sup>-</sup> , I <sup>-</sup> ,<br>NO <sub>3</sub> <sup>-</sup> , SO <sub>4</sub> <sup>2-</sup> ,<br>WO <sub>4</sub> <sup>2-</sup> , HPO <sub>4</sub> <sup>2-</sup> ,<br>PO <sub>4</sub> <sup>3-</sup>                                                                                                                                                              | –           | S5               |
| <b>JXUST-47</b>        | DMF                                 | 0.106 mM            | HPO <sub>4</sub> <sup>2-</sup> , HCO <sub>3</sub> <sup>-</sup> ,<br>CO <sub>3</sub> <sup>2-</sup> , WO <sub>4</sub> <sup>2-</sup> ,<br>Br <sup>-</sup> , SO <sub>4</sub> <sup>2-</sup> ,<br>AcO <sup>-</sup> , NO <sub>3</sub> <sup>-</sup>                                                                                                                                                               | –           | <b>This work</b> |

## References

- S1. G. M. Sheldrick, *Acta Crystallogr., Sect. C: Struct. Chem.*, 2015, **71**, 3–8.
- S2 R. Dalapati and S. Biswas, *Sens. Actuators B: Chem.*, 2017, **251**, 250–255.
- S3. K. Naskar, A. K. Bhanja, S. Paul, K. Pal and C. Sinha, *Cryst. Growth Des.*, 2020, **20**, 6453–6460.
- S4. S. Jindal and J. N. Moorthy, *Inorg. Chem.*, 2022, **61**, 3942–3950.
- S5. Y. P. Li, J. H. Zhang, X. X. Zhang and S. J. Liu, *CrystEngComm*, 2023, **25**, 6424–6423.
